# Supplementary material for: Carcinoma-specific expression of P2Y11 receptor and its contribution in ATP-induced purinergic signalling and cell migration in human hepatocellular carcinoma cells
Source: PubMed Central journal article supplement (PMC5514908; doi:10.18632/oncotarget.16191), 2017-03-14
Supplement: oncotarget-08-37278-s001.pdf [file oncotarget-08-37278-s001.pdf]

## Carcinoma-specific expression of P2Y<sub>11</sub> receptor and its contribution in ATP-induced purinergic signalling and cell migration in human hepatocellular carcinoma cells

### SUPPLEMENTARY MATERIALS

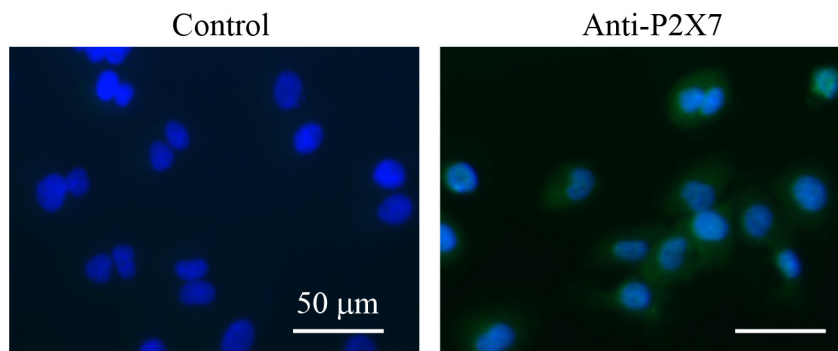

**Supplementary Figure 1: Immunostaining of the P2X7 receptor in Huh-7 cells.** Representative confocal images showing control cells stained only with the secondary antibody (left panel) and cells stained with primary anti-P2X7 antibody and the secondary antibody (right panel). Cells were counterstained with DAPI. Similar results were observed in two independent experiments.

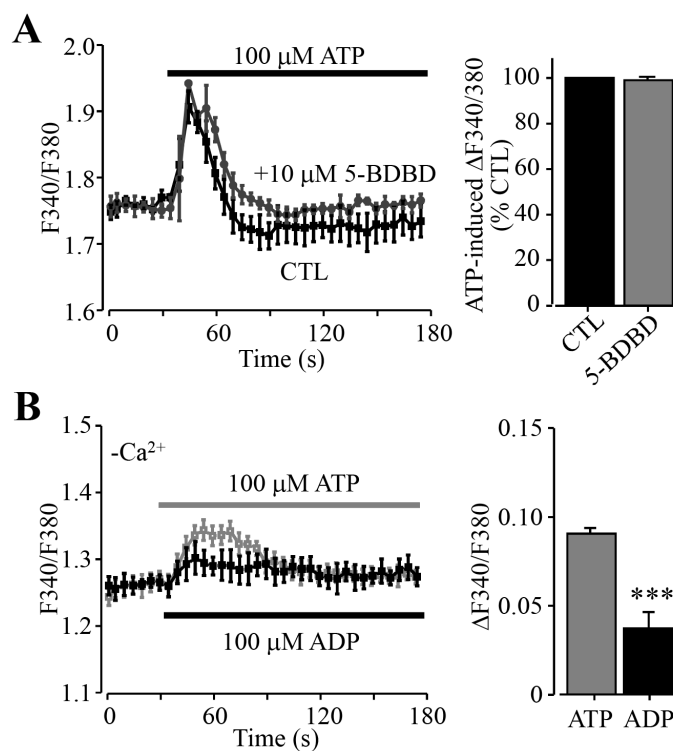

**Supplementary Figure 2: Ca<sup>2+</sup> responses to P2X or P2Y agonists in Huh-7 cell.** (A) *Left*, representative recordings of 100 μM ATP-induced Ca<sup>2+</sup> responses in control cells or cells pre-treated with 10 μM 5-BDBD, with six wells of cells for each case. *Right*, summary of ATP-induced peak increase in the [Ca<sup>2+</sup>]<sub>i</sub> in control and 5-BDBD-treated cells, expressed as % of that in control cells, from twelve wells from two independent experiments. (B) *Left*, representative recordings of the Ca<sup>2+</sup> responses induced by 100 μM ADP (black) and ATP (grey) in extracellular Ca<sup>2+</sup>-free solutions with six wells of cells. *Right*, summary of the peak increase in the [Ca<sup>2+</sup>]<sub>i</sub>. \*\*\*, p < 0.001.

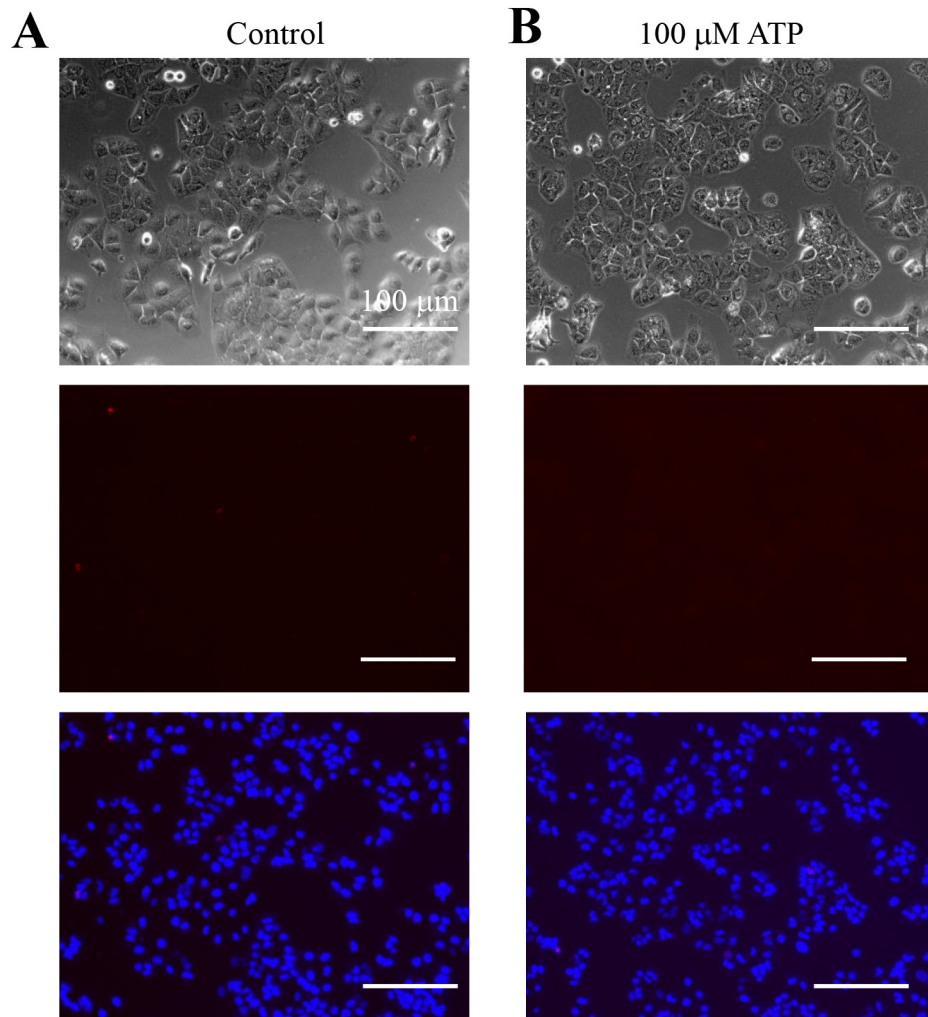

**Supplementary Figure 3: No effect of ATP on Huh-7 cell survival.** Representative bright field (top) and fluorescent images showing PI staining (middle) and merged images (bottom) showing PI and Hoechst staining under control conditions (**A**) and in the presence of 100  $\mu$ M ATP for 24 hr (**B**) from four wells of cells for each condition.
